# Supplementary material for: Overcoming resistance to immune checkpoint therapy in PTEN-null prostate cancer by intermittent anti-PI3Kα/β/δ treatment
Source: PubMed Central journal article supplement (PMC8748754; doi:10.1038/s41467-021-27833-0), 2022-01-10
Supplement: 41467_2021_27833_MOESM3_ESM.pdf [file 41467_2021_27833_MOESM3_ESM.pdf]

Title: Supplementary Data 1.

Description: Lists of Pathway and gene expression alterations detected by RNAseq analysis.
